# Supplementary material for: Pd/C-catalyzed reductive carbonylation of nitroaromatics for the synthesis of unsymmetrical ureas: one-step synthesis of neburon
Source: Royal Society of Chemistry journal article supplement (doi:10.1039/c8nj02413h), 2018-01-01

## Supporting Information

# **Pd/C-Catalyzed Reductive Carbonylation of Nitroaromatics for the Synthesis of Unsymmetrical Ureas: One-Step Synthesis of Neburon**

Chong-Liang Li,<sup>[a]</sup> Jin-Bao Peng,<sup>\*[a]</sup> Xinxin Qi,<sup>[a]</sup> Jun Ying,<sup>[a]</sup> and Xiao-Feng Wu<sup>\*[a,b]</sup>

[a] Department of Chemistry, Zhejiang Sci-Tech University, Xiasha Campus, Hangzhou 310018  
(People's Republic of China)

[b] Leibniz-Institut für Katalyse e.V. an der Universität Rostock, Albert-Einstein-Strasse 29a, 18059  
Rostock (Germany)

## CONTENTS

- 1. General details and materials**
- 2. Optimization of the Reaction Condition**
- 3. General Procedure**
- 4. Spectroscopic Data of Products**
- 5. Copy of <sup>1</sup>H and <sup>13</sup>C NMR Spectra of Products**

## 1. General details and materials

All reactions were carried out under N<sub>2</sub> atmosphere. All reagents were from commercial sources and used as received without further purification. All solvents were dried by standard techniques, and distilled prior to use. Column chromatography was performed on silica gel (200-300 meshes) using petroleum ether (b.p. 60~90 °C) and ethyl acetate as eluent. <sup>1</sup>H and <sup>13</sup>C NMR spectra were taken on 400 MHz instruments and spectral data were reported in ppm relative to tetramethylsilane (TMS) as internal standard and CDCl<sub>3</sub> (<sup>1</sup>H NMR δ 7.26, <sup>13</sup>C NMR δ 77.0) as solvent. All coupling constants (*J*) are reported in Hz with the following abbreviations: s = singlet, d = doublet, dd = double doublet, t = triplet, dt = double triplet, q = quatrilplet, m = multiplet, br = broad.

### The structure of the starting materials:

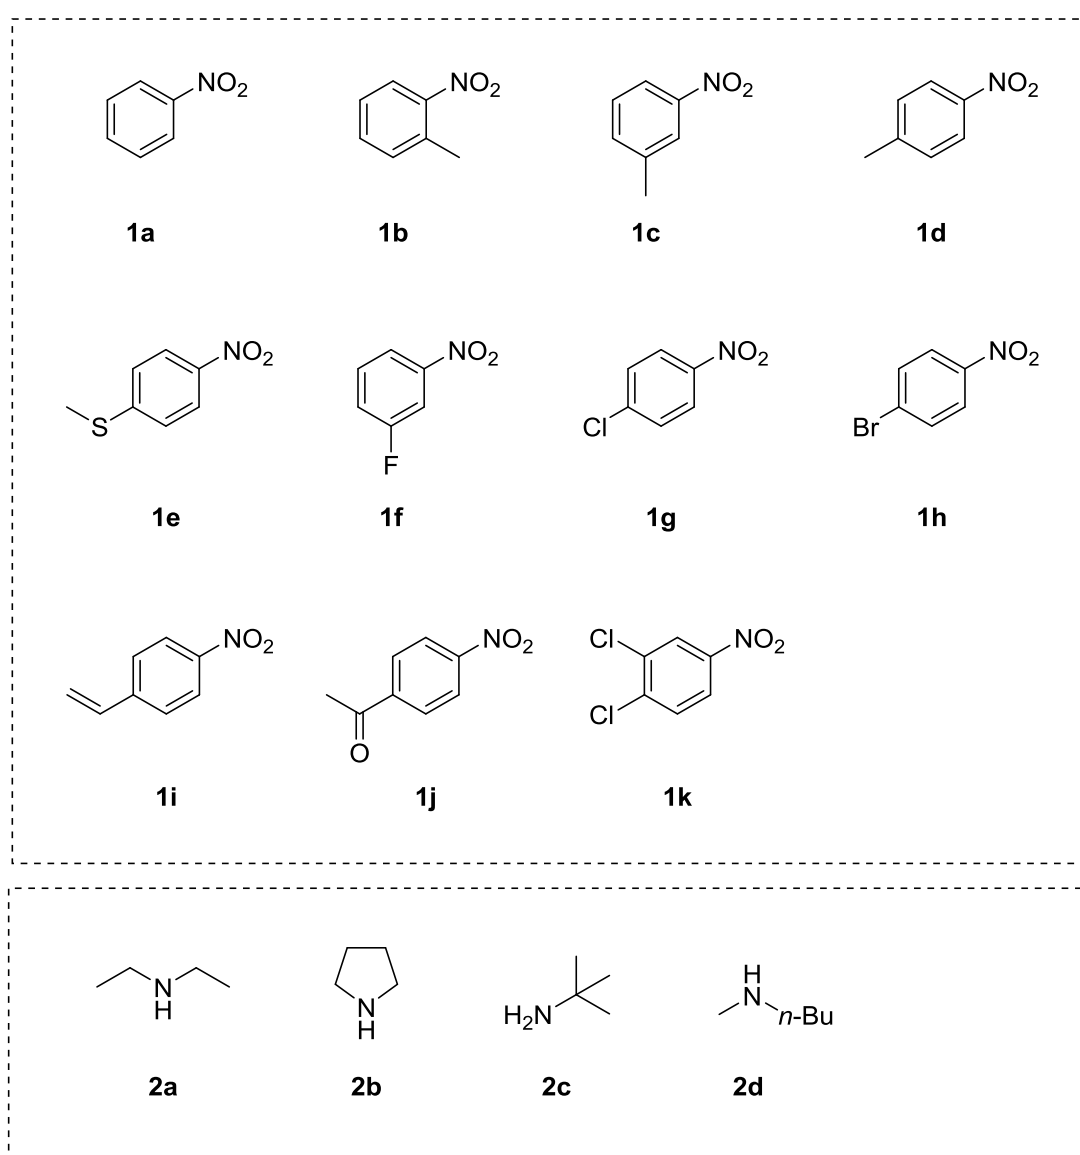

## 2. Optimization of the Reaction Condition<sup>a</sup>

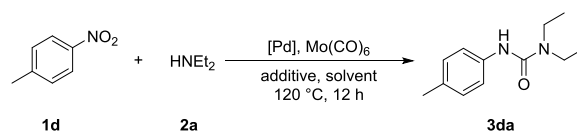

| Entry           | [Pd]                                                    | Ligand               | additive   | Solvent            | Base                           | Yield (%) <sup>b</sup> |
|-----------------|---------------------------------------------------------|----------------------|------------|--------------------|--------------------------------|------------------------|
| 1               | Pd(OAc) <sub>2</sub> (3%)                               | BINAP (3%)           | -          | 1,4-dioxane        | -                              | 20                     |
| 2               | Pd(OAc) <sub>2</sub> (3%)                               | BINAP (3%)           | MeI        | 1,4-dioxane        | -                              | 62                     |
| 3               | Pd(OAc) <sub>2</sub> (3%)                               | BINAP (3%)           | TBAI       | 1,4-dioxane        | -                              | 55                     |
| 4               | Pd(OAc) <sub>2</sub> (3%)                               | BINAP (3%)           | NaI        | 1,4-dioxane        | -                              | 78                     |
| 5               | Pd(OAc) <sub>2</sub> (3%)                               | BINAP (3%)           | KI         | 1,4-dioxane        | -                              | 52                     |
| 6               | Pd(OAc) <sub>2</sub> (3%)                               | Xantphos (3%)        | NaI        | 1,4-dioxane        | -                              | 58                     |
| 7               | Pd(OAc) <sub>2</sub> (3%)                               | dppp (3%)            | NaI        | 1,4-dioxane        | -                              | 54                     |
| 8               | Pd(OAc) <sub>2</sub> (3%)                               | PPh <sub>3</sub> (6) | NaI        | 1,4-dioxane        | -                              | 51                     |
| 9               | Pd(OAc) <sub>2</sub> (3%)                               | PCy <sub>3</sub> (6) | NaI        | 1,4-dioxane        | -                              | 70                     |
| <b>10</b>       | <b>Pd/C (10 mg)</b>                                     | -                    | <b>NaI</b> | <b>1,4-dioxane</b> | -                              | <b>79</b>              |
| 11              | Pd(PPh <sub>3</sub> ) <sub>2</sub> Cl <sub>2</sub> (2%) | -                    | NaI        | 1,4-dioxane        | -                              | 72                     |
| 12              | Pd(PPh <sub>3</sub> ) <sub>4</sub> (2%)                 | -                    | NaI        | 1,4-dioxane        | -                              | 78                     |
| 13              | PdCl <sub>2</sub> (2%)                                  | BINAP (5)            | NaI        | 1,4-dioxane        | -                              | 72                     |
| 14              | -                                                       | -                    | NaI        | 1,4-dioxane        | -                              | 63                     |
| 15 <sup>c</sup> | Pd/C (10 mg)                                            | -                    | NaI        | 1,4-dioxane        | -                              | 0                      |
| 16              | Pd/C (10 mg)                                            | -                    | NaI        | toluene            | -                              | 67                     |
| 17              | Pd/C (10 mg)                                            | -                    | NaI        | CH <sub>3</sub> CN | -                              | 38                     |
| 18              | Pd/C (10 mg)                                            | -                    | NaI        | DMF                | -                              | 15                     |
| 19              | Pd/C (10 mg)                                            | -                    | NaI        | Cyclohexane        | -                              | 56                     |
| 20 <sup>d</sup> | Pd/C (10 mg)                                            | -                    | NaI        | 1,4-dioxane        | DABCO                          | 16                     |
| 21 <sup>d</sup> | Pd/C (10 mg)                                            | -                    | NaI        | 1,4-dioxane        | K <sub>3</sub> PO <sub>4</sub> | trace                  |
| 22 <sup>d</sup> | Pd/C (10 mg)                                            | -                    | NaI        | 1,4-dioxane        | DBU                            | 6%                     |

<sup>a</sup>Reaction conditions: **1d** (1.5 mmol), **2a** (1.0 mmol), Mo(CO)<sub>6</sub> (1.0 mmol), additive (0.2 mmol), solvent (2 mL), 120 °C, 12 h.

<sup>b</sup>Isolated yield.

<sup>c</sup>1.0 mmol H<sub>2</sub>O was added.

<sup>d</sup>base (1.5 mmol), 1,4-dioxane (4 mL)

## 3. General Procedure

An oven-dried tube, which was equipped with a magnetic stir bar, was charged with Pd/C (10 mg), Mo(CO)<sub>6</sub> (1.0 equiv.), NaI (0.2 equiv.) and nitroarenes (1.5 equiv.) at room temperature. The tube was evacuated and backfilled with N<sub>2</sub> (this process was repeated 3 times). Then, a solution of diethylamine (1.0 mmol, 1.0 equiv.) in 1,4-dioxane (2 mL) was added to the reaction tube via syringe. The tube was sealed and the mixture was stirred at 120 °C for 12 h. After the reaction was completed, the reaction mixture was cooled to room temperature and filtered through a pad of Celite using excess EtOAc. The crude product was purified via flash chromatography (petroleum ether / ethyl acetate 5:1) to provide the pure product.

#### 4. Spectroscopic Data of Products

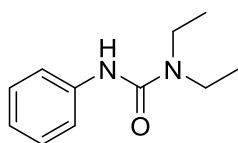

##### 1,1-Diethyl-3-phenylurea, **3aa**, 56% yield

Following general procedure, using nitrobenzene (155  $\mu\text{L}$ , 1.5 mmol) and diethylamine (105  $\mu\text{L}$ , 1.0 mmol), Compound **3aa** (107.6 mg, 56% yield) was a yellow oil.

$^1\text{H NMR}$  (400 MHz,  $\text{CDCl}_3$ )  $\delta$  7.43 (d,  $J = 8.1$  Hz, 2H), 7.31 (t,  $J = 7.9$  Hz, 2H), 7.05 (t,  $J = 7.3$  Hz, 1H), 6.39 (s, 1H), 3.41 (q,  $J = 7.1$  Hz, 4H), 1.26 (t,  $J = 7.2$  Hz, 6H).

$^{13}\text{C NMR}$  (101 MHz,  $\text{CDCl}_3$ )  $\delta$  154.54, 139.26, 128.72, 122.68, 119.75, 41.54, 13.87.

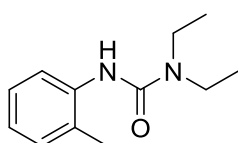

##### 1,1-Diethyl-3-(*o*-tolyl)urea, **3ba**, 64% yield

Following general procedure, using 1-methyl-2-nitrobenzene (179  $\mu\text{L}$ , 1.5 mmol) and diethylamine (105  $\mu\text{L}$ , 1.0 mmol), Compound **3ba** (131.8 mg, 64% yield) was a yellow powder.

$^1\text{H NMR}$  (400 MHz,  $\text{CDCl}_3$ )  $\delta$  7.76 (d,  $J = 8.1$  Hz, 1H), 7.16 (dd,  $J = 18.3, 7.7$  Hz, 2H), 6.98 (t,  $J = 7.4$  Hz, 1H), 6.16 (s, 1H), 3.37 (q,  $J = 7.2$  Hz, 4H), 2.24 (s, 3H), 1.23 (t,  $J = 7.2$  Hz, 6H).

$^{13}\text{C NMR}$  (101 MHz,  $\text{CDCl}_3$ )  $\delta$  154.70, 137.37, 130.19, 127.91, 126.71, 123.43, 122.33, 41.70, 17.81, 13.93.

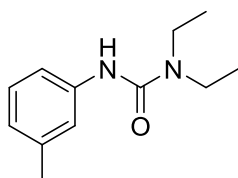

##### 1,1-Diethyl-3-(*m*-tolyl)urea, **3ca**, 71% yield

Following general procedure, using 1-methyl-3-nitrobenzene (180  $\mu\text{L}$ , 1.5 mmol) and diethylamine (105  $\mu\text{L}$ , 1.0 mmol), Compound **3ca** (146.3 mg, 71% yield) was a yellow powder.

$^1\text{H NMR}$  (400 MHz,  $\text{CDCl}_3$ )  $\delta$  7.36 – 7.22 (m, 3H), 6.90 (s, 1H), 6.36 (s, 1H), 3.44 (q,  $J = 7.2$  Hz, 4H), 2.39 (s, 3H), 1.29 (t,  $J = 7.2$  Hz, 6H).

$^{13}\text{C NMR}$  (101 MHz,  $\text{CDCl}_3$ )  $\delta$  154.56, 139.16, 138.59, 128.53, 123.50, 120.42, 116.73, 41.56, 21.42, 13.88.

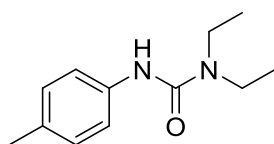

##### 1,1-Diethyl-3-(*p*-tolyl)urea, **3da**, 79% yield

Following general procedure, using 1-methyl-4-nitrobenzene (207.8 mg, 1.5 mmol) and diethylamine (105  $\mu\text{L}$ , 1.0 mmol), Compound **3da** (162.7 mg, 79% yield) was a yellow powder.

$^1\text{H NMR}$  (400 MHz,  $\text{CDCl}_3$ )  $\delta$  7.31 (d,  $J = 8.2$  Hz, 2H), 7.11 (d,  $J = 8.2$  Hz, 2H), 6.32 (s, 1H), 3.40 (q,  $J = 7.2$  Hz, 4H), 2.33 (s, 3H), 1.25 (t,  $J = 7.2$  Hz, 6H).

$^{13}\text{C NMR}$  (101 MHz,  $\text{CDCl}_3$ )  $\delta$  154.80, 136.73, 132.24, 129.27, 120.07, 41.56, 20.69, 13.92.

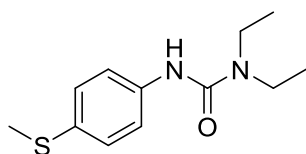

**1,1-Diethyl-3-(4-(methylthio)phenyl)urea, 3ea, 65% yield**

Following general procedure, using methyl(4-nitrophenyl)sulfane (256.3 mg, 1.5 mmol) and diethylamine (105  $\mu\text{L}$ , 1.0 mmol), Compound **3ea** (154.7 mg, 65% yield) was a yellow powder.

$^1\text{H NMR}$  (400 MHz,  $\text{CDCl}_3$ )  $\delta$  7.33 (d,  $J = 8.5$  Hz, 2H), 7.21 (d,  $J = 8.6$  Hz, 2H), 6.27 (s, 1H), 3.36 (q,  $J = 7.1$  Hz, 4H), 2.44 (s, 3H), 1.21 (t,  $J = 7.1$  Hz, 6H).

$^{13}\text{C NMR}$  (101 MHz,  $\text{CDCl}_3$ )  $\delta$  154.46, 137.21, 131.43, 128.57, 120.44, 41.59, 17.24, 14.03.

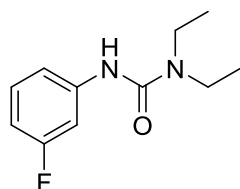

**1,1-Diethyl-3-(3-fluorophenyl)urea, 3fa, 70% yield**

Following general procedure, using 1-fluoro-3-nitrobenzene (161  $\mu\text{L}$ , 1.5 mmol) and diethylamine (105  $\mu\text{L}$ , 1.0 mmol), Compound **3fa** (147.0 mg, 70% yield) was a yellow powder.

$^1\text{H NMR}$  (400 MHz,  $\text{CDCl}_3$ )  $\delta$  7.35 (d,  $J = 11.5$  Hz, 1H), 7.15 (dd,  $J = 14.9, 8.1$  Hz, 1H), 7.01 (d,  $J = 8.1$  Hz, 1H), 6.66 (td,  $J = 8.3, 1.8$  Hz, 1H), 6.59 (s, 1H), 3.33 (q,  $J = 7.1$  Hz, 4H), 1.18 (t,  $J = 7.2$  Hz, 6H).

$^{13}\text{C NMR}$  (101 MHz,  $\text{CDCl}_3$ )  $\delta$  162.96 (d,  $J_{\text{CF}} = 243.3$  Hz), 154.22, 141.05 (d,  $J_{\text{CF}} = 11.2$  Hz), 129.55 (d,  $J_{\text{CF}} = 9.6$  Hz), 114.82, 109.07 (d,  $J_{\text{CF}} = 21.4$  Hz), 106.97 (d,  $J_{\text{CF}} = 26.3$  Hz), 41.47, 13.76.

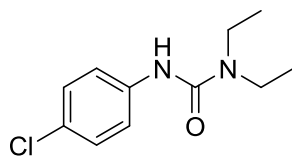

**3-(4-Chlorophenyl)-1,1-diethylurea, 3ga, 73% yield**

Following general procedure, using 1-chloro-4-nitrobenzene (238.7 mg, 1.5 mmol) and diethylamine (105  $\mu\text{L}$ , 1.0 mmol), Compound **3ga** (165.0 mg, 73% yield) was a yellow powder.

$^1\text{H NMR}$  (400 MHz,  $\text{CDCl}_3$ )  $\delta$  7.32 (d,  $J = 8.8$  Hz, 2H), 7.19 (d,  $J = 8.8$  Hz, 2H), 6.44 (s, 1H), 3.33 (q,  $J = 7.1$  Hz, 4H), 1.18 (t,  $J = 7.1$  Hz, 6H).

$^{13}\text{C NMR}$  (101 MHz,  $\text{CDCl}_3$ )  $\delta$  154.42, 137.99, 128.66, 127.58, 121.12, 41.57, 13.89.

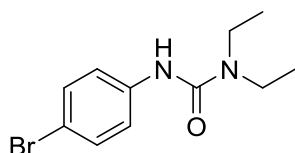

**3-(4-Bromophenyl)-1,1-diethylurea, 3ha, 83% yield**

Following general procedure, using 1-bromo-4-nitrobenzene (306.1 mg, 1.5 mmol) and diethylamine (105  $\mu$ L, 1.0 mmol), Compound **3ha** (224.9 mg, 83% yield) was a yellow powder.

$^1\text{H NMR}$  (400 MHz,  $\text{CDCl}_3$ )  $\delta$  7.39 (d,  $J = 8.7$  Hz, 2H), 7.32 (d,  $J = 8.8$  Hz, 2H), 6.43 (s, 1H), 3.39 (q,  $J = 7.1$  Hz, 4H), 1.24 (t,  $J = 7.1$  Hz, 6H).

$^{13}\text{C NMR}$  (101 MHz,  $\text{CDCl}_3$ )  $\delta$  154.27, 138.43, 131.57, 121.34, 115.06, 41.55, 13.85.

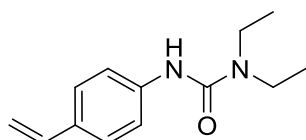

**1,1-Diethyl-3-(4-vinylphenyl)urea, 3ia, 46% yield**

Following general procedure, using 4-nitrostyrene (194  $\mu$ L, 1.5 mmol) and diethylamine (105  $\mu$ L, 1.0 mmol), Compound **3cg** (100.3 mg, 46% yield) was a yellow powder.

$^1\text{H NMR}$  (400 MHz,  $\text{CDCl}_3$ )  $\delta$  7.34 (m,  $J = 8.7$  Hz, 4H), 6.65 (dd,  $J = 17.6, 10.9$  Hz, 1H), 6.33 (s, 1H), 5.64 (d,  $J = 17.6$  Hz, 1H), 5.14 (d,  $J = 10.9$  Hz, 1H), 3.37 (q,  $J = 7.1$  Hz, 4H), 1.22 (t,  $J = 7.1$  Hz, 6H).

$^{13}\text{C NMR}$  (101 MHz,  $\text{CDCl}_3$ )  $\delta$  154.39, 138.95, 136.30, 132.21, 126.68, 119.53, 112.04, 41.61, 13.91.

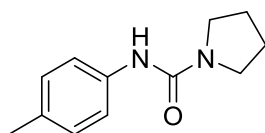

**N-(p-tolyl)pyrrolidine-1-carboxamide, 3db, 58% yield**

Following general procedure, using 1-methyl-4-nitrobenzene (207.8 mg, 1.5 mmol) and tetrahydropyrrole (83  $\mu$ L, 1.0 mmol), Compound **3db** (118.3 mg, 58% yield) was a yellow powder.

$^1\text{H NMR}$  (400 MHz,  $\text{CDCl}_3$ )  $\delta$  7.28 (d,  $J = 8.3$  Hz, 2H), 7.06 (d,  $J = 8.2$  Hz, 2H), 6.17 (s, 1H), 3.43 (t,  $J = 6.5$  Hz, 4H), 2.28 (s, 3H), 1.93 (t,  $J = 6.5$  Hz, 4H).

$^{13}\text{C NMR}$  (101 MHz,  $\text{CDCl}_3$ )  $\delta$  154.09, 136.62, 132.10, 129.23, 119.69, 45.70, 25.54, 20.65.

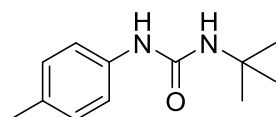

**1-(tert-Butyl)-3-(p-tolyl)urea, 3dc, 69% yield**

Following general procedure, using 1-methyl-4-nitrobenzene (207.8 mg, 1.5 mmol) and *tert*-butylamine (106  $\mu$ L, 1.0 mmol), Compound **3dc** (142.1 mg, 69% yield) was a yellow powder.

$^1\text{H NMR}$  (400 MHz,  $\text{CDCl}_3$ )  $\delta$  7.17 (s, 1H), 7.16 (d,  $J = 8.2$  Hz, 2H), 7.04 (d,  $J = 8.2$  Hz, 2H), 5.38 (s, 1H), 2.26 (s, 3H), 1.32 (s, 9H).

$^{13}\text{C}$  NMR (101 MHz,  $\text{CDCl}_3$ )  $\delta$  155.75, 136.52, 132.54, 129.53, 120.57, 50.36, 29.30, 20.68.

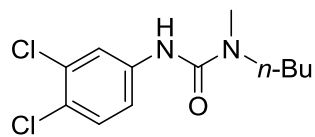

**1-Butyl-3-(3,4-dichlorophenyl)-1-methylurea, 3kd, 64% yield**

Following general procedure, using 3,4-dichloronitrobenzene (290.9 mg, 1.5 mmol) and N-butylmethylamine (93%, 128  $\mu\text{L}$ , 1.0 mmol), Compound **3kd** (175.4 mg, 64% yield) was a white powder.

$^1\text{H}$  NMR (400 MHz,  $\text{CDCl}_3$ )  $\delta$  7.61 (d,  $J = 2.4$  Hz, 1H), 7.27 (d,  $J = 8.7$  Hz, 1H), 7.20 (dd,  $J = 8.7, 2.4$  Hz, 1H), 6.73 (s, 1H), 3.36 – 3.30 (m, 2H), 2.98 (s, 3H), 1.60 – 1.50 (m, 2H), 1.33 (dq,  $J = 14.6, 7.3$  Hz, 2H), 0.95 (t,  $J = 7.3$  Hz, 3H).

$^{13}\text{C}$  NMR (101 MHz,  $\text{CDCl}_3$ )  $\delta$  154.86, 138.96, 132.18, 129.97, 125.59, 121.43, 119.16, 48.79, 34.49, 30.01, 19.96, 13.77.

## 5. Copy of $^1\text{H}$ and $^{13}\text{C}$ NMR Spectra of Products

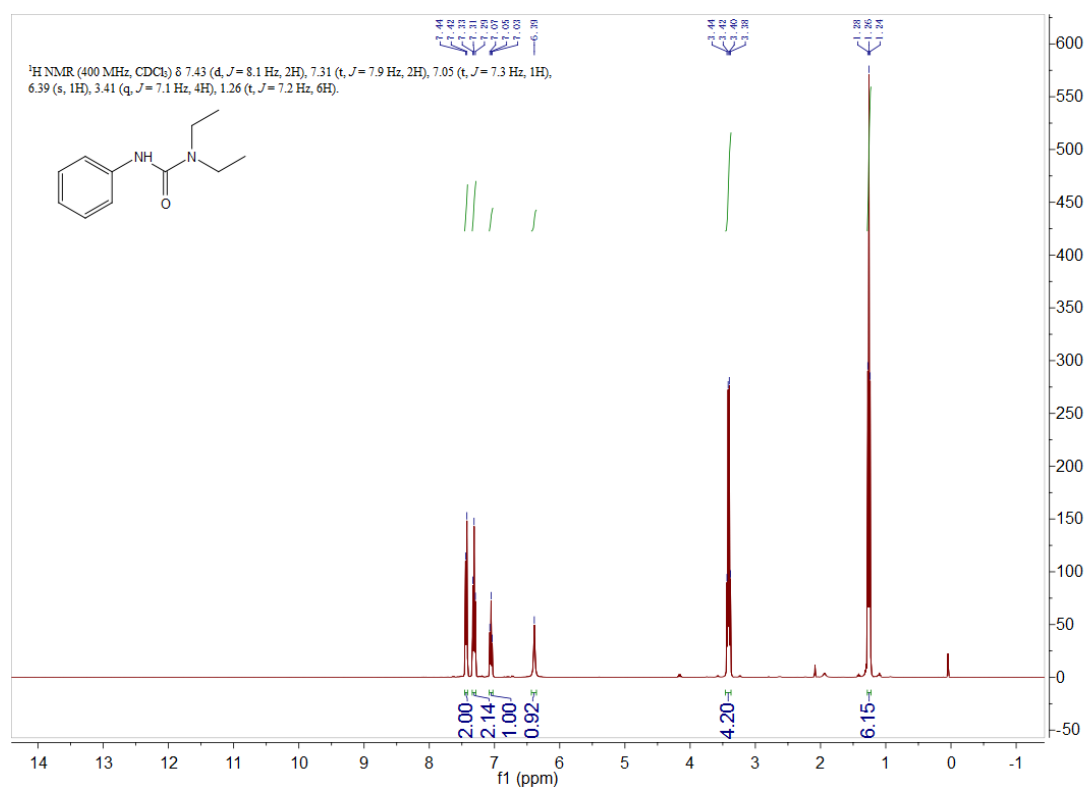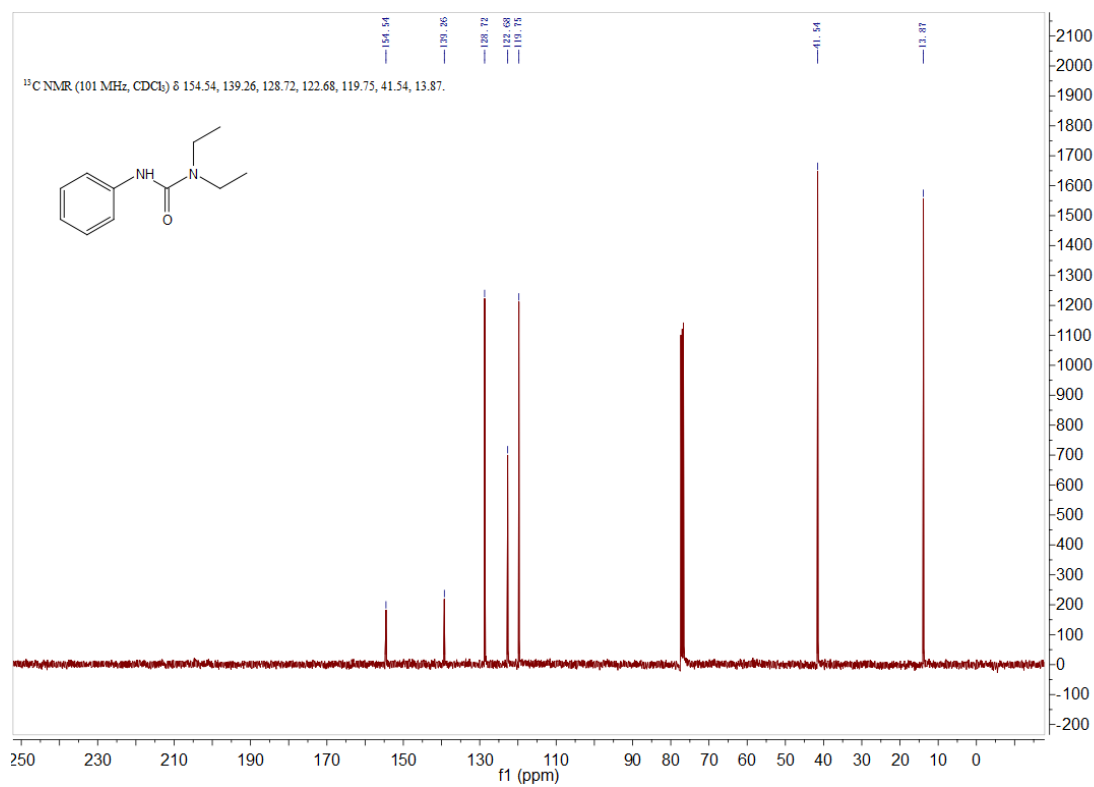



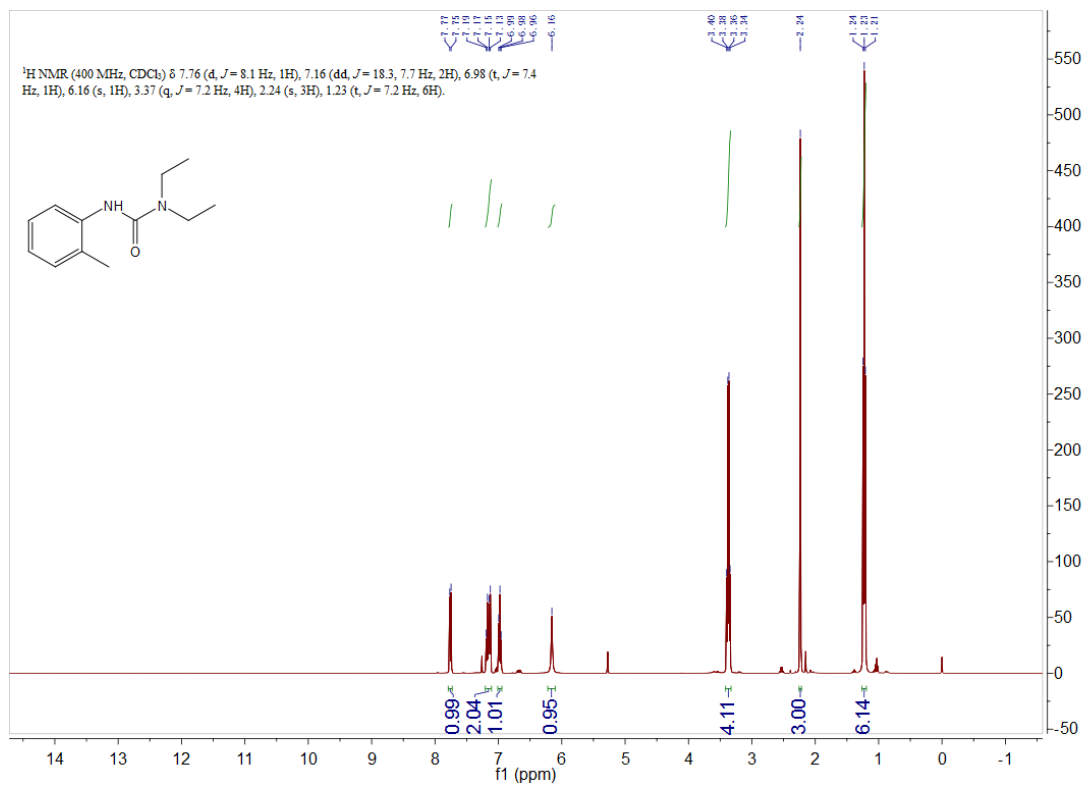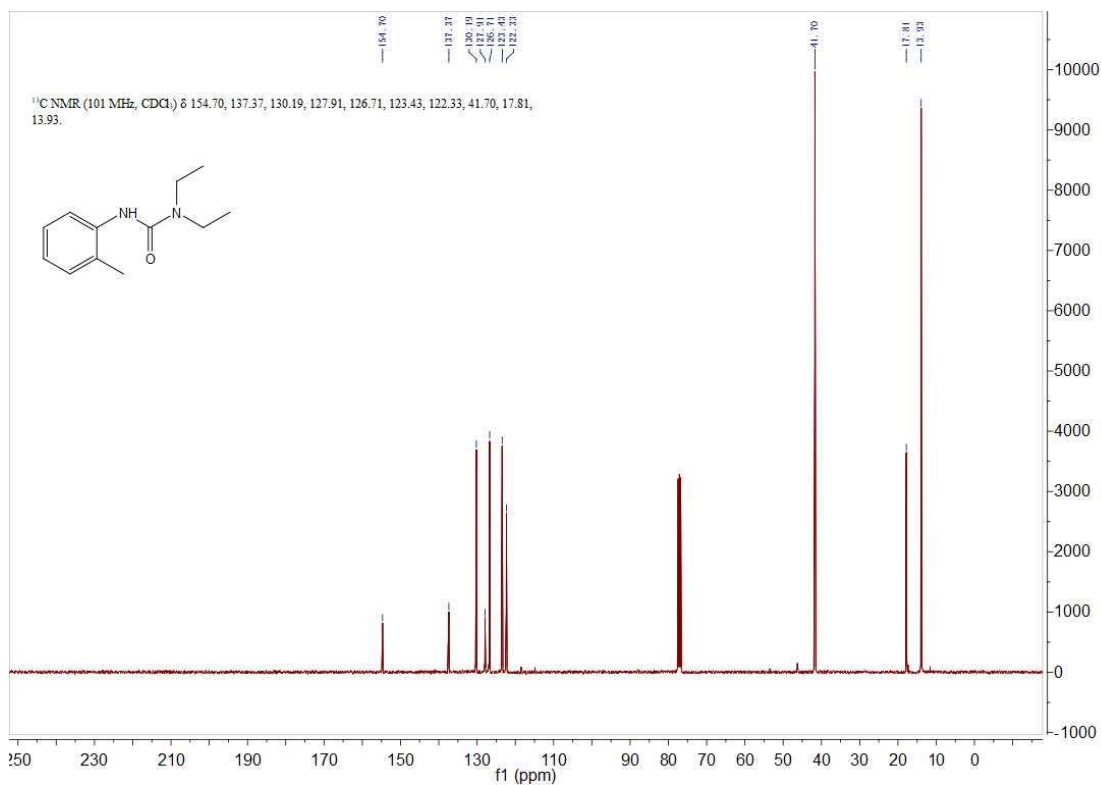

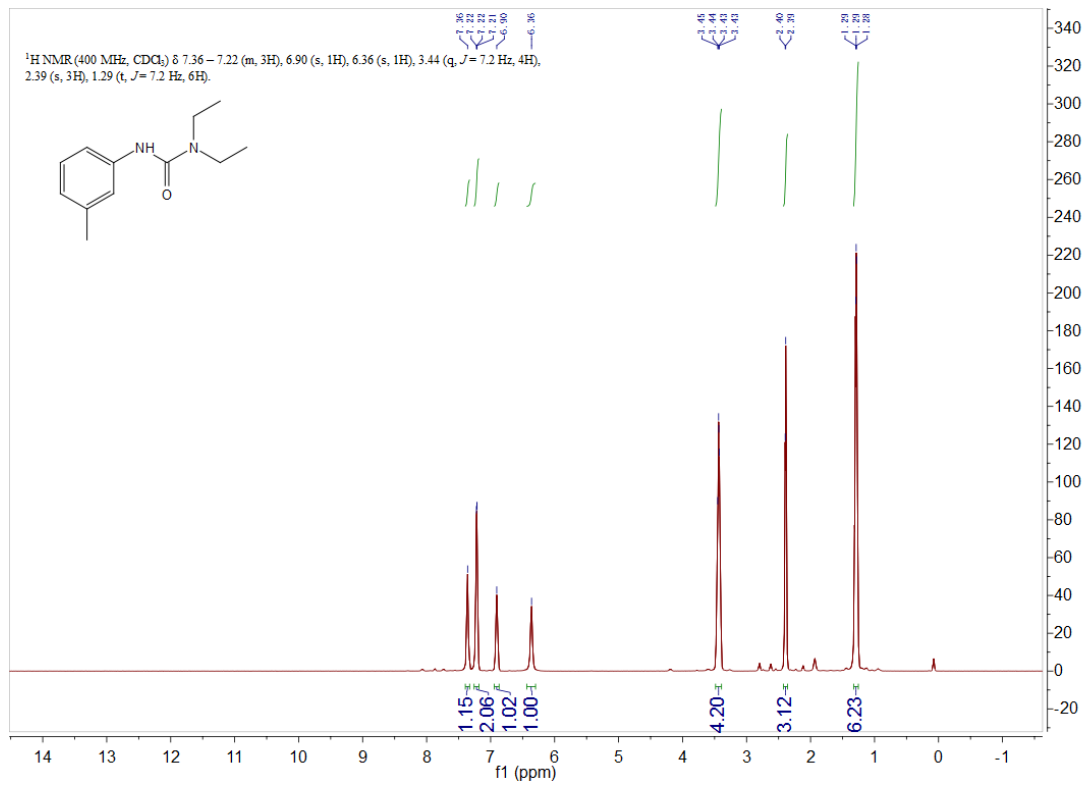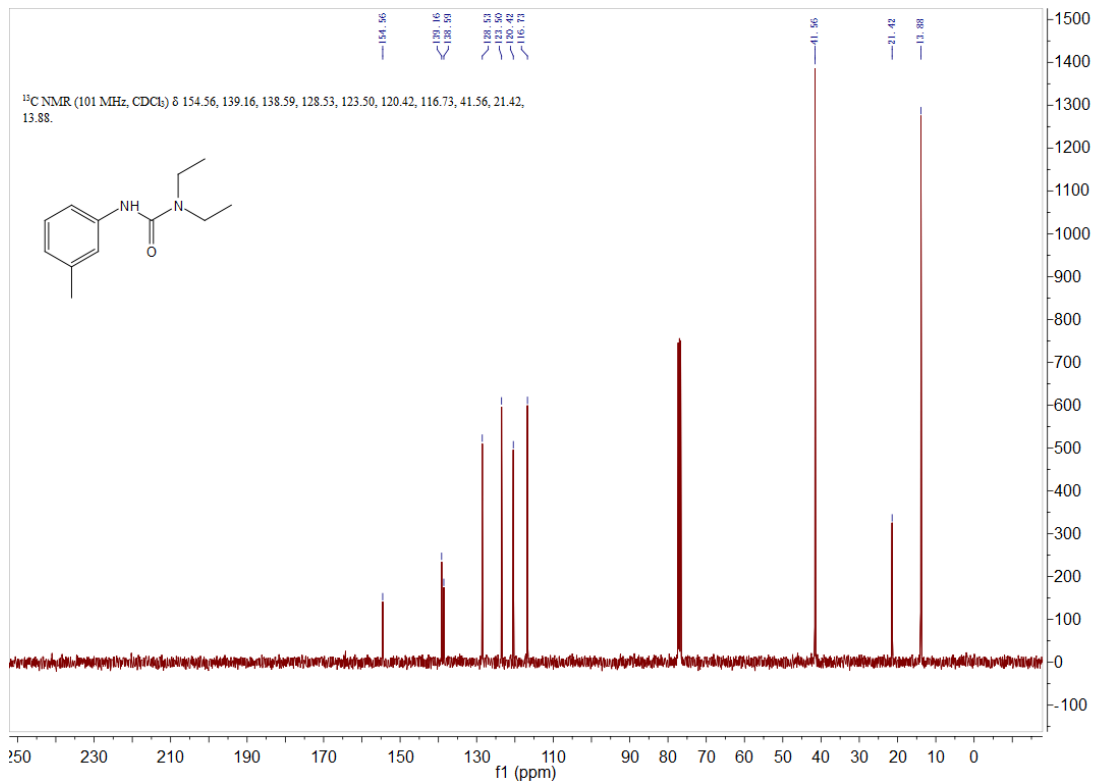

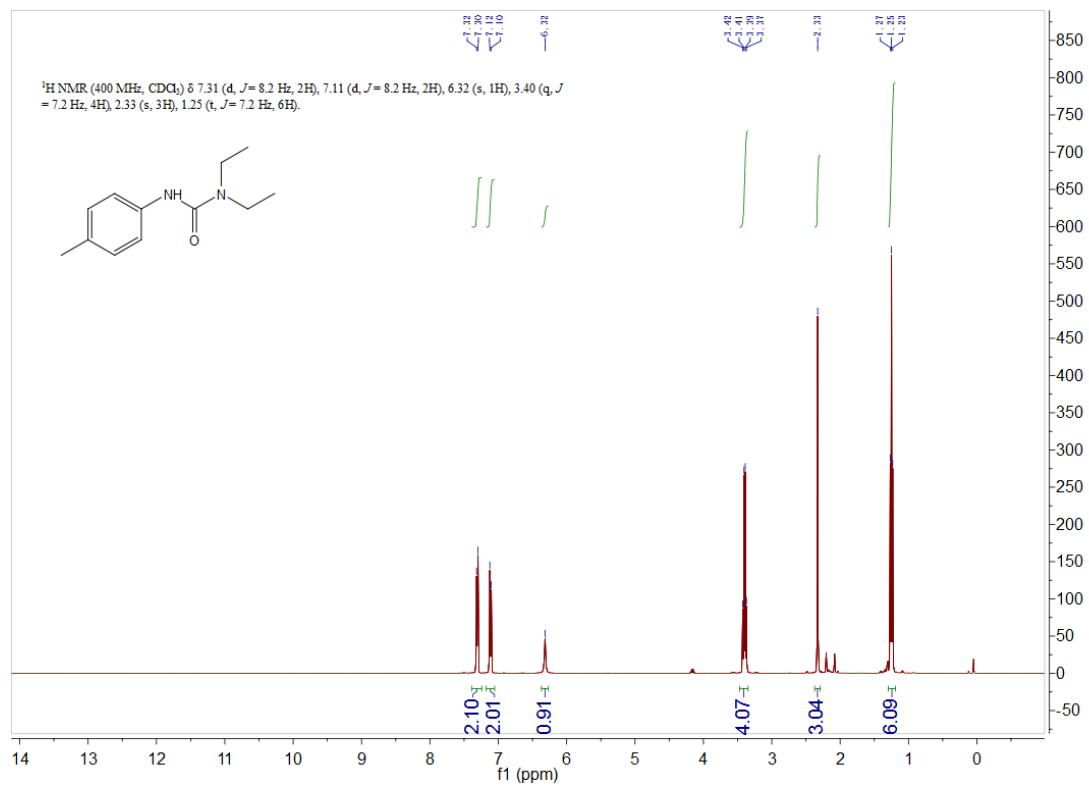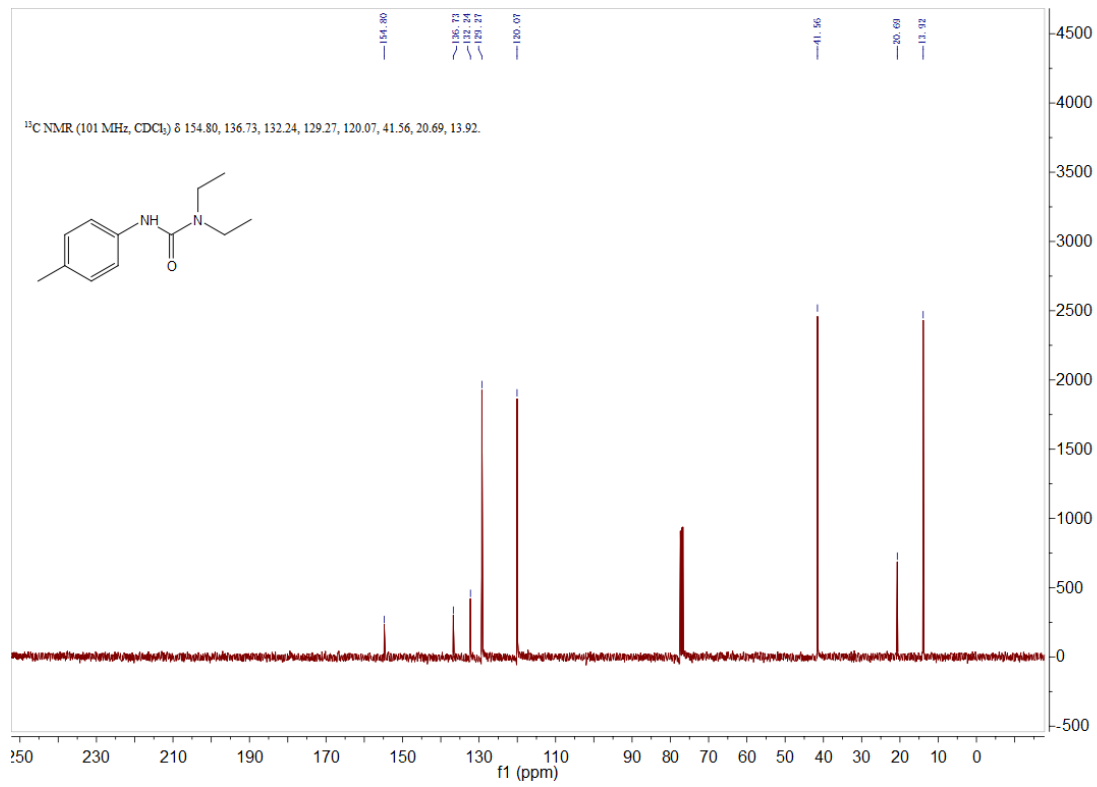

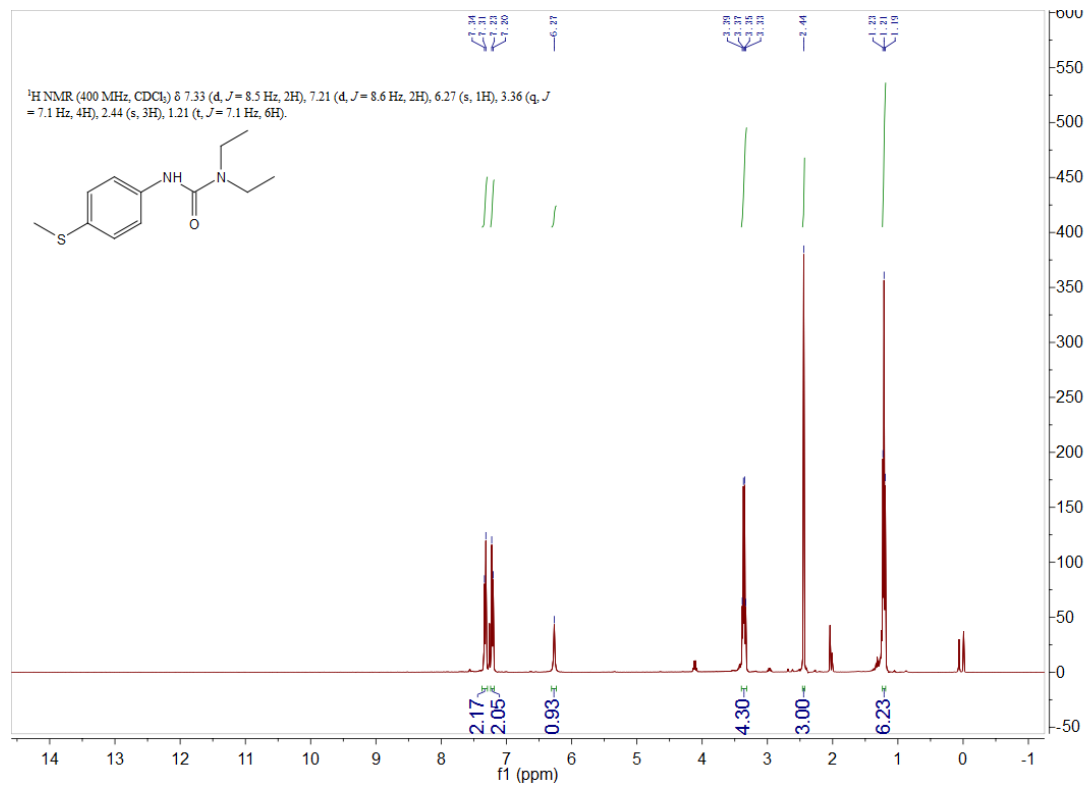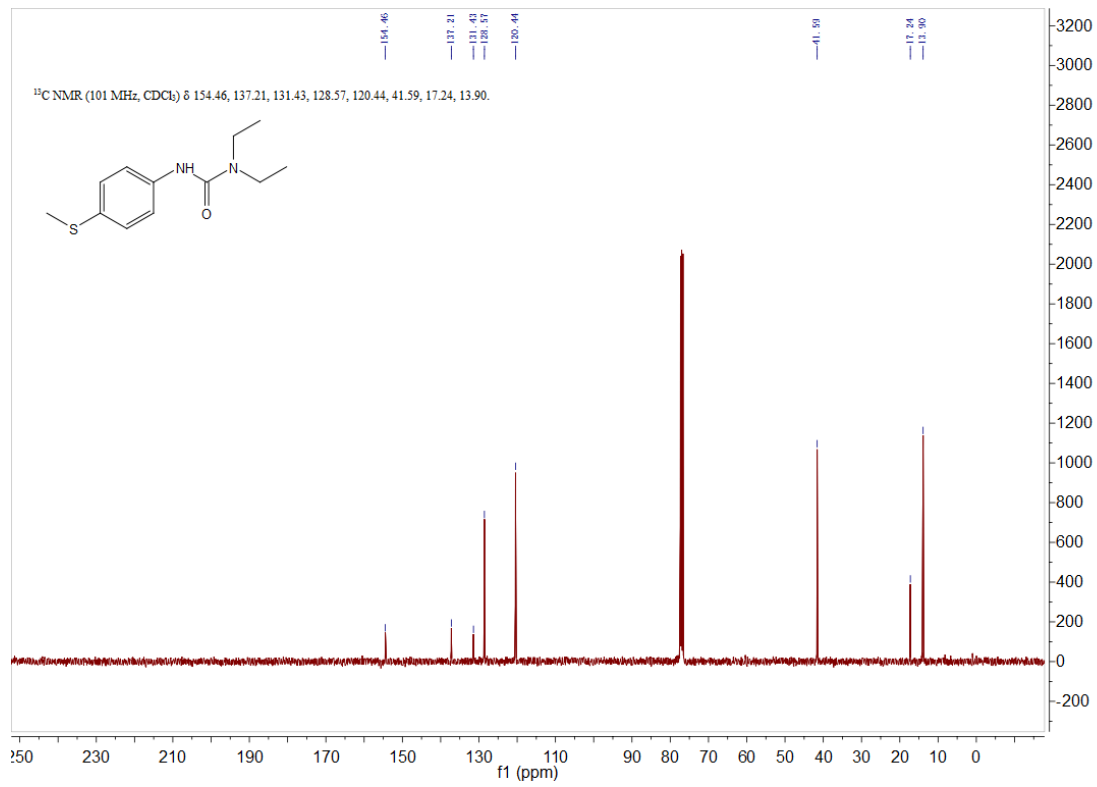

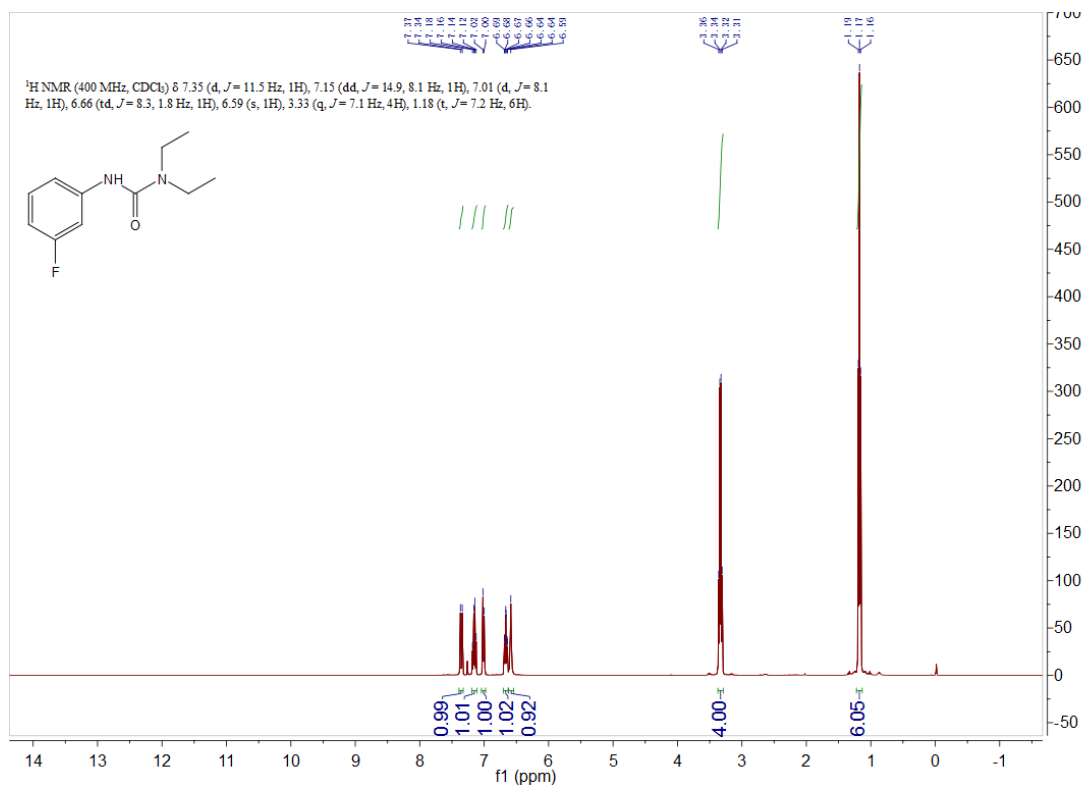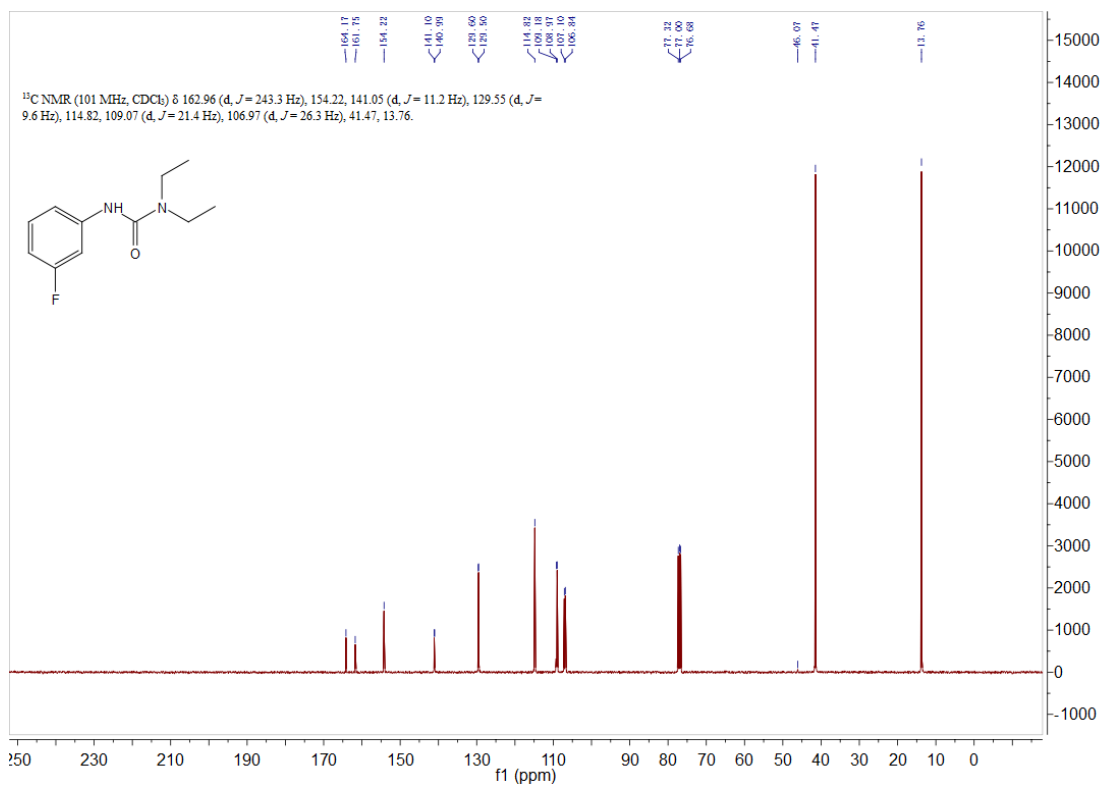

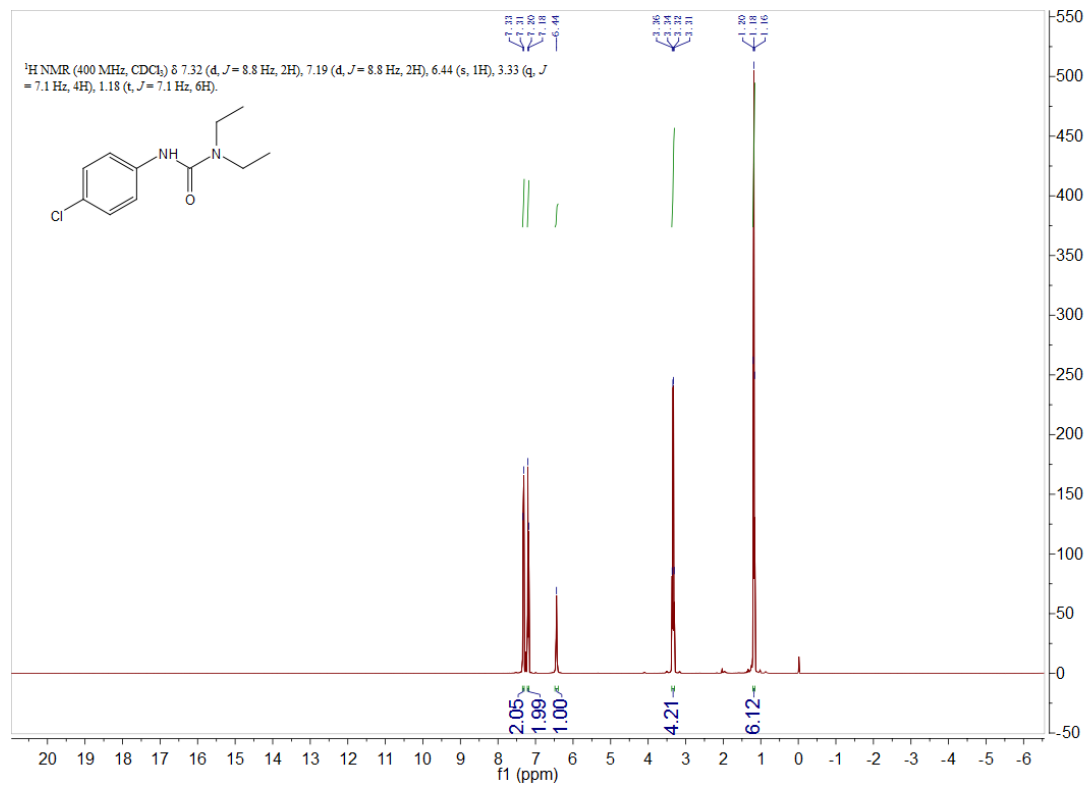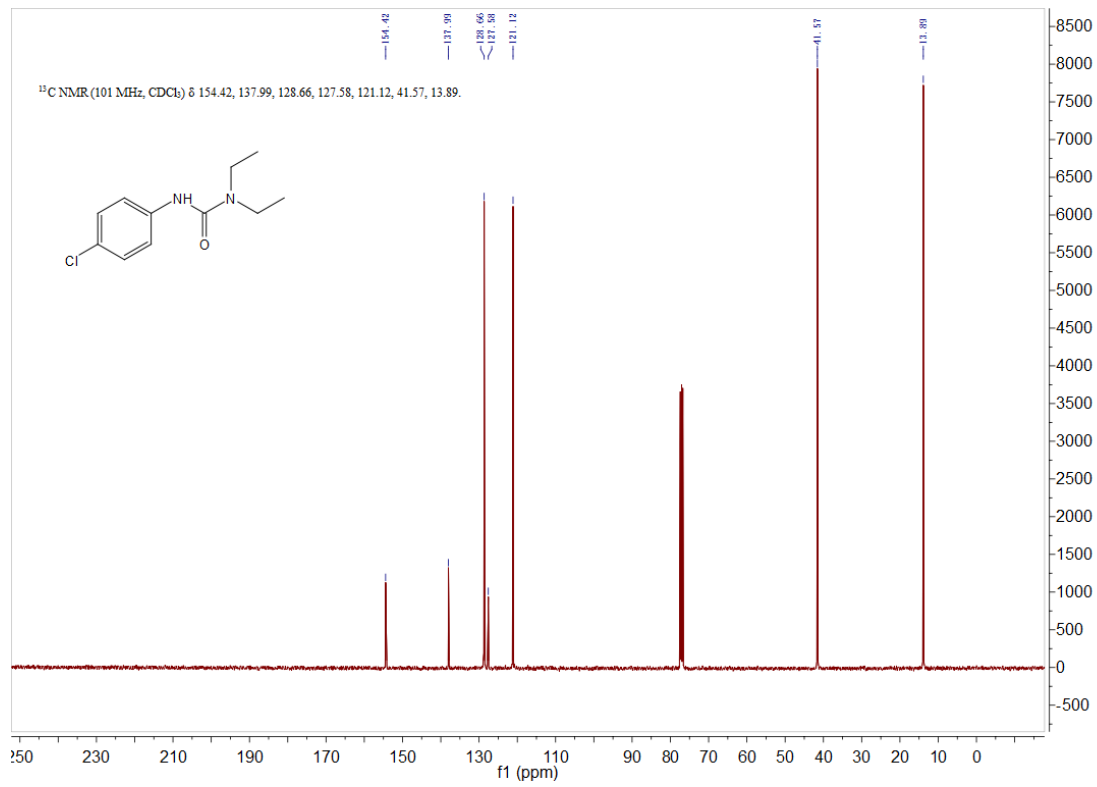

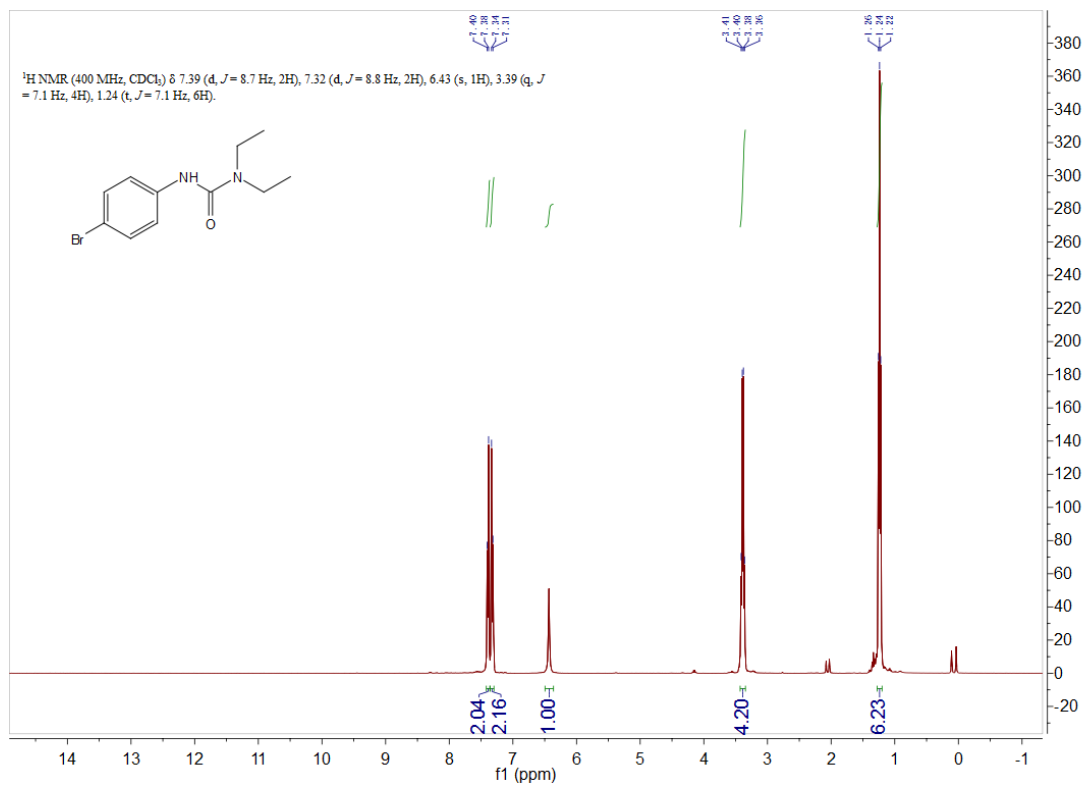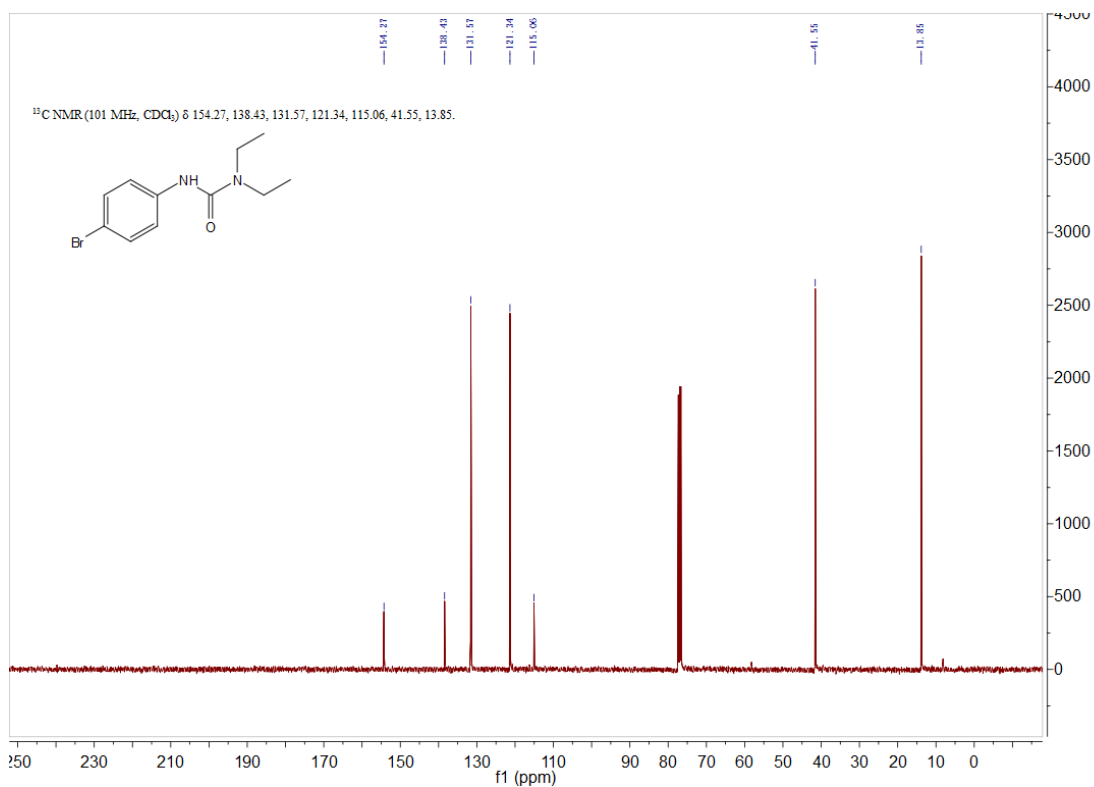

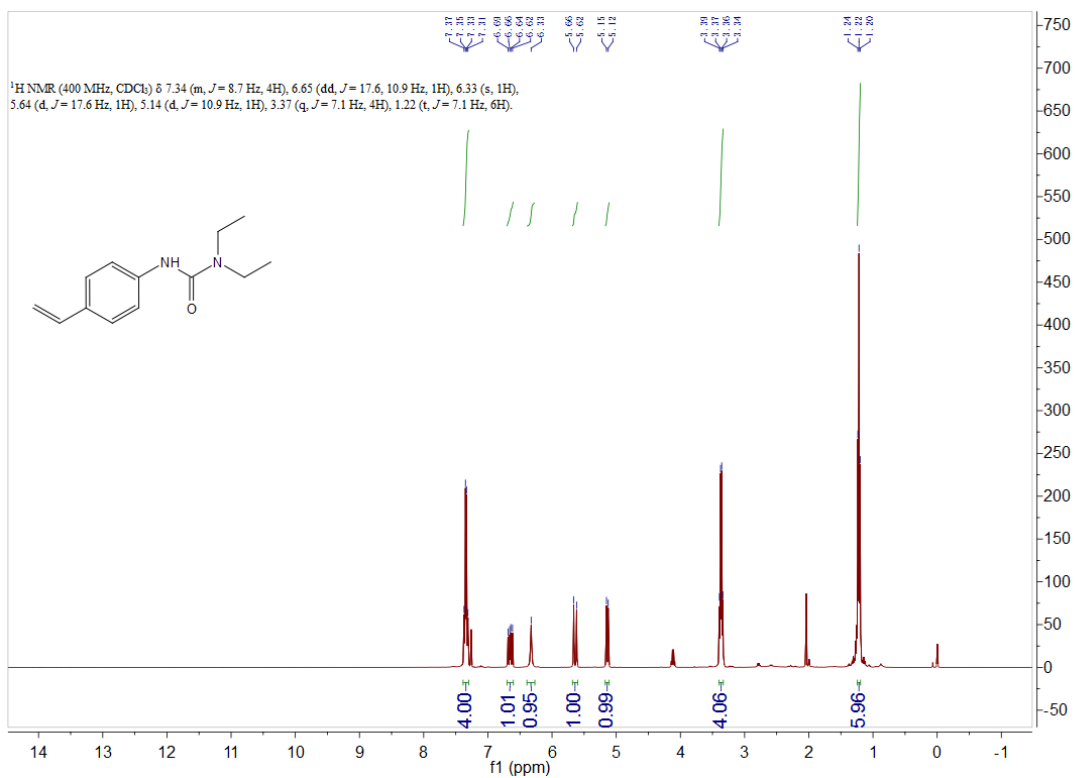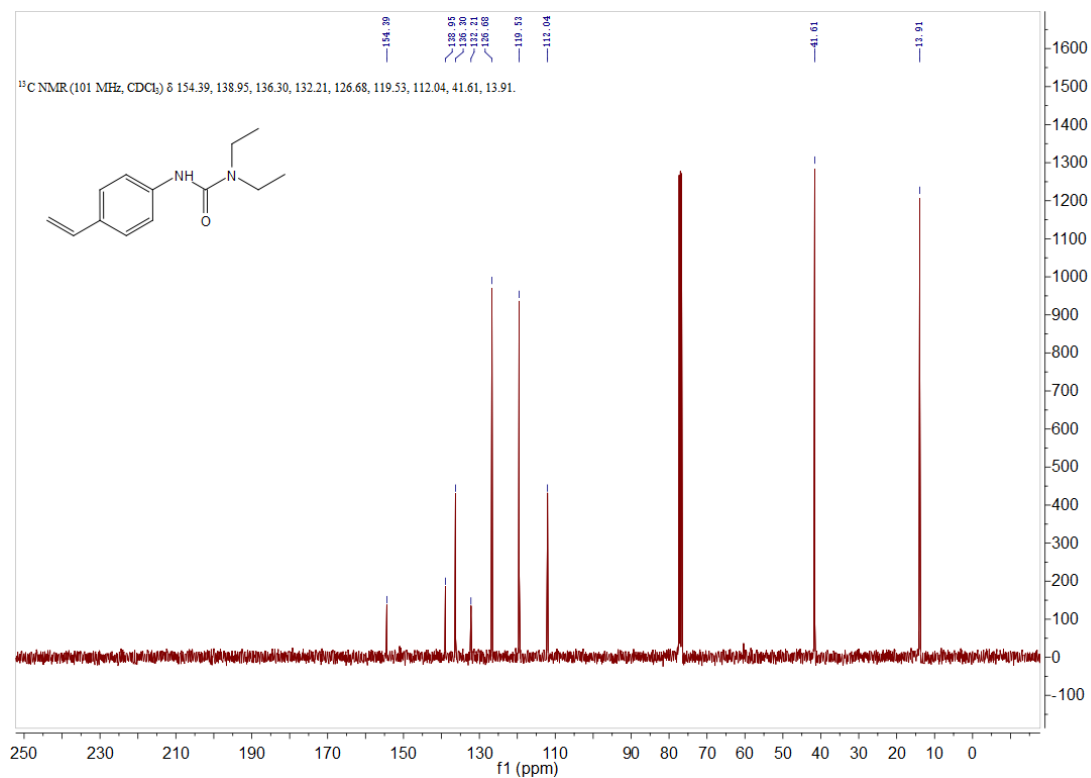



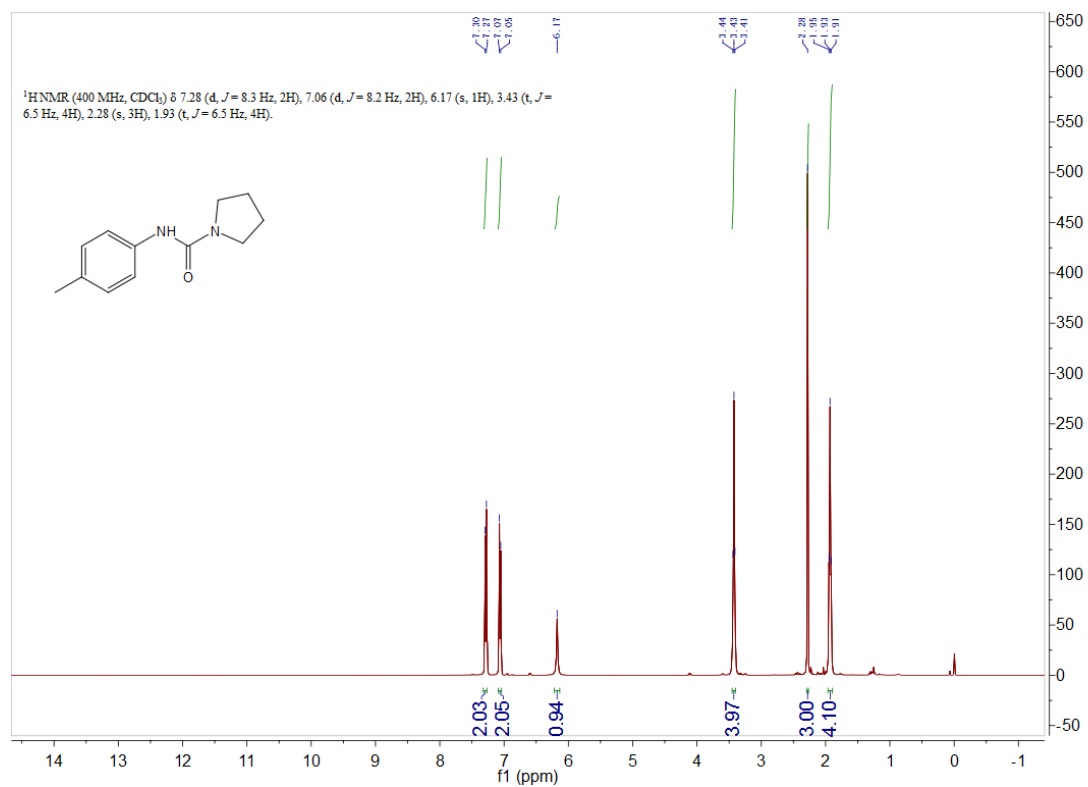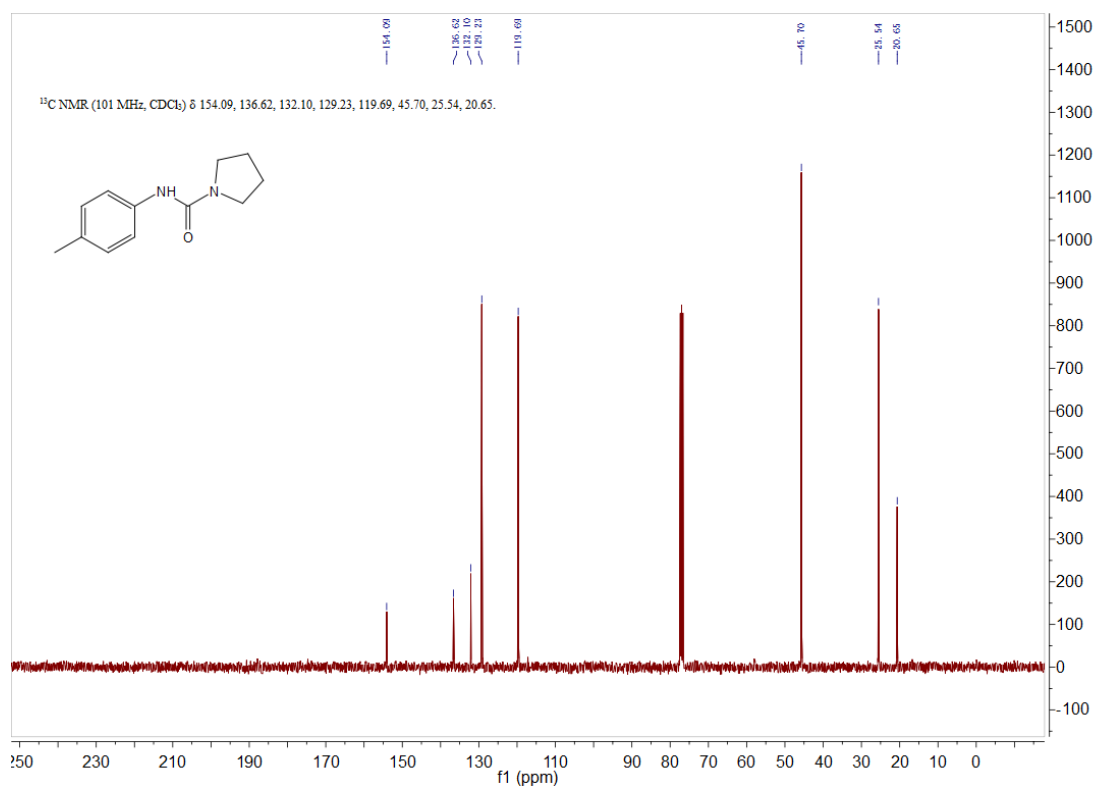

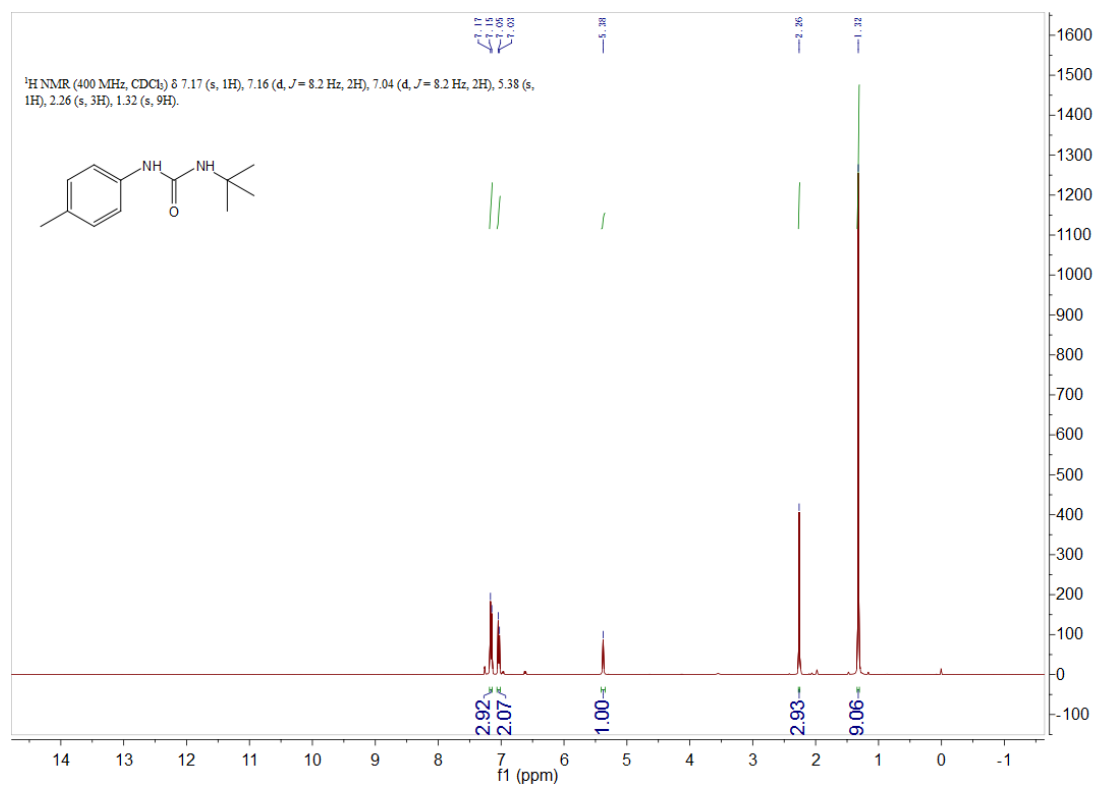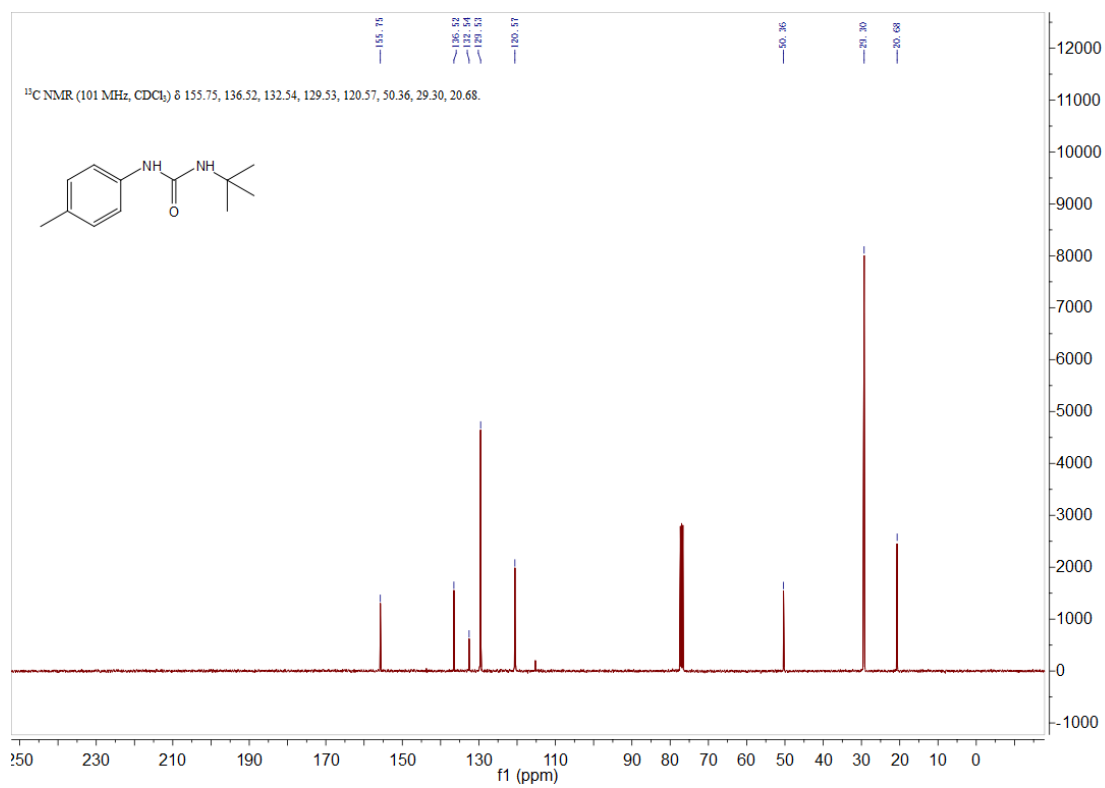

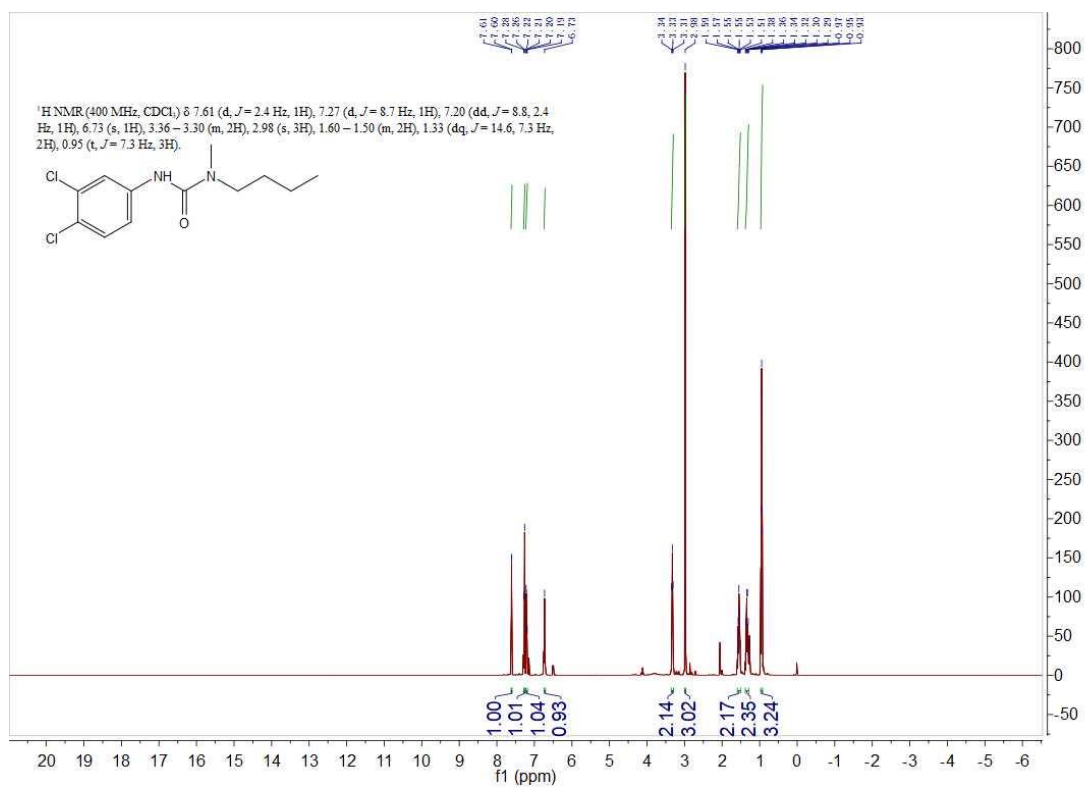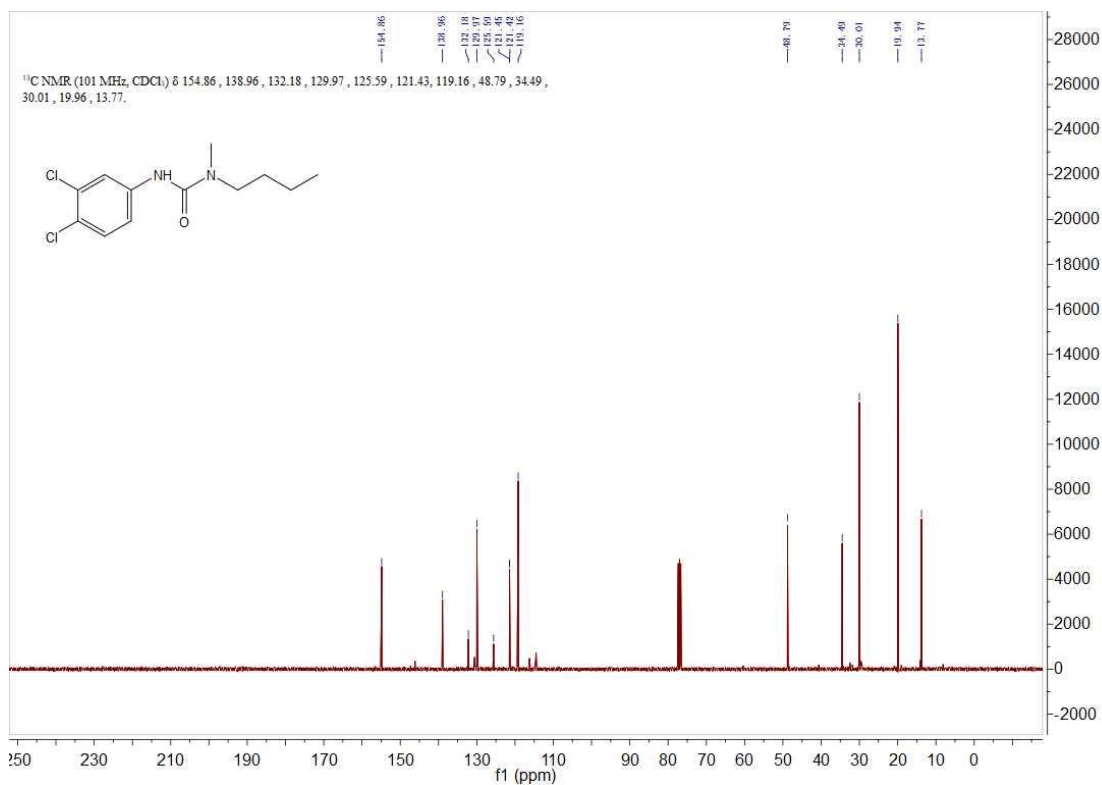

Supplement: c8nj02413h1.pdf [file c8nj02413h1.pdf]
